# Supplementary material for: Intrauterine growth restriction in piglets alters blood cell counts and impairs cytokine responses in peripheral mononuclear cells 24 days post-partum
Source: PubMed Central journal article supplement (PMC7069946; doi:10.1038/s41598-020-61623-w), 2020-03-13
Supplement: 41598_2020_61623_MOESM1_ESM.pdf [file 41598_2020_61623_MOESM1_ESM.pdf]

1 **Intrauterine growth restriction in piglets alters blood cell counts and impairs cytokine**  
2 **responses in peripheral mononuclear cells 24 days post-partum**

3 Charlotte Amdi<sup>1\*</sup>, Julie C. Lynegaard<sup>1</sup>, Thomas Thymann<sup>1</sup> and Andrew R. Williams<sup>1</sup>

4

5

6 <sup>1</sup>Department of Veterinary and Animal Sciences, Faculty of Health and Medical Sciences,  
7 University of Copenhagen, DK-1870 Frederiksberg C, Denmark

8

9

10 \*Corresponding author: Charlotte Amdi Williams; e-mail: ca@sund.ku.dk

11 Short title: LPS challenge in IUGR and normal pigs

12

13 **Supplementary Figure 1 – Gating Strategy for T-cells**

14 PBMCs were gated on forward/side scatter and CD3+ cells gated. CD4+ CD8+ single and double positive  
15 cells were then identified.

16

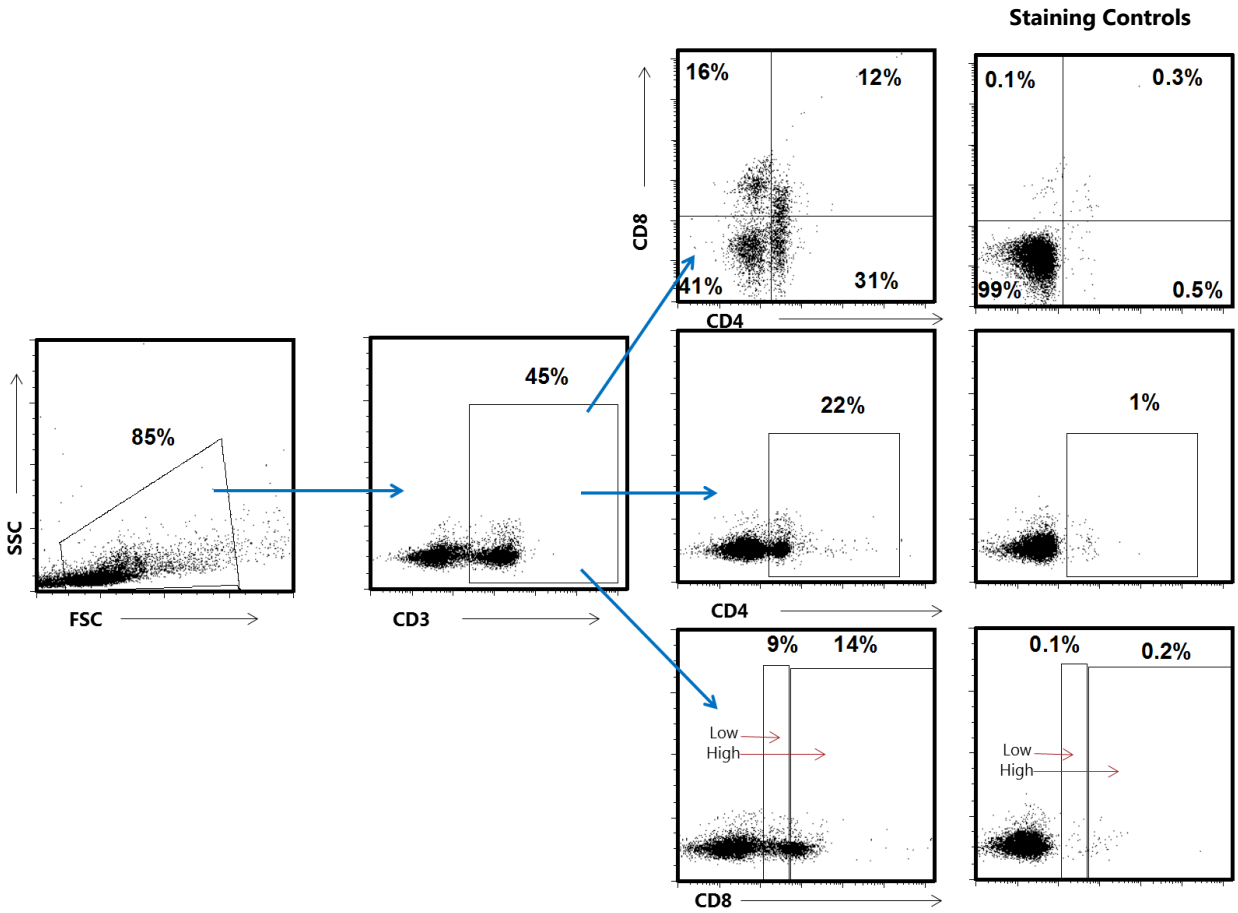

17
